# Supplementary material for: Addenbrooke’s Cognitive Examination–Third Edition Predicts Neuropsychological Test Performance
Source: Atypon-hosted journal article supplement (doi:10.1176/appi.neuropsych.21080196), 2022-08-22
Supplement: jnp_21080196_correction01.pdf [file jnp_21080196_correction01.pdf]

## **Correction to Zarrella et al.**

When the article “Addenbrooke’s Cognitive Examination–Third Edition Predicts Neuropsychological Test Performance,” by Giuliana V. Zarrella, B.A., et al. (doi: 10.1176/appi.neuropsych.21080196), was published online on August 22, 2022, the Figure 1 caption misreported the level of statistical significance for the comparisons. The caption should have indicated  $p < 0.05$ , two-tailed. The article was corrected and reposted online on September 16, 2022.
